# Supplementary material for: Mapping Accessibility for Earthquake Hazard Response in the Historic Urban Center of Bucharest
Source: Copernicus journal article supplement (doi:10.5194/nhess-2018-41), 2018-03-01
Supplement: Supplementary file [file nhess-2018-41-AC4-supplement.pdf]

# Mapping Accessibility for Earthquake Hazard Response in the Historic Urban Centre of Bucharest

Cristina Merciu<sup>1</sup>, Ioan Ianoş<sup>1</sup>, George-Laurențiu Merciu<sup>2</sup>, Roy Jones<sup>3</sup>, and George Pomeroy<sup>4</sup>

5 <sup>1</sup>Interdisciplinary Centre of Advanced Research on Territorial Dynamics, University of Bucharest, Blvd. Regina Elisabeta, 4-12, code 030018, Romania

<sup>2</sup>Faculty of Geography, University of Bucharest, Blvd. Nicolae Bălcescu, 1, code 030018, Romania

<sup>3</sup>Geography Discipline Group, Curtin University, Perth, Western Australia 6845, Australia

10 <sup>4</sup>Geography – Earth Science Department, Shippensburg University of Pennsylvania. 1871 Old Main Drive, Shippensburg PA 17257

*Correspondence to:* Ioan Ianoş ([ianos50@yahoo.com](mailto:ianos50@yahoo.com))

**Abstract.** Planning for post-disaster accessibility is essential for the provision of emergency and other services to protect life and property in impacted areas. Such planning is particularly important in congested historic districts where narrow streets and at-risk structures are more common and may even prevail. Indeed, a standard method of measuring accessibility, through the use of isochrones, may be particularly inappropriate in these congested historic areas. Bucharest, Romania, is a city with a core of historic buildings and narrow streets. Furthermore, Bucharest ranks second only to Istanbul among large European cities in terms of its seismic risk. This paper provides an accessibility simulation for central Bucharest using mapping and GIS technologies. It hypothesizes that all buildings in the Risk 1 class would collapse in an earthquake of a similar magnitude to those of 1940 and 1977. The authors then simulate accessibility impacts in the historic centre of Bucharest, such as the isolation of certain areas, and blockages of some street sections. In this simulation, accessibility will be substantially compromised by anticipated and extensive building collapse. Therefore, policy makers and planners need to fully understand and incorporate the serious implications of this compromised accessibility when planning emergency services and disaster recovery responses.

15  
20  
25

## 1 Introduction

A longitudinal analysis of natural hazards in major urban areas shows an increasing awareness of the frequency of disasters and especially of earthquakes (Eshghi & Larson, 2008; Armaş, 2012; Lu & Xu, 2014). Indeed, earthquakes are among the natural disasters that generate the greatest human and material losses (Geis, 2000;

30 Armaş & Avram, 2008; Atanasiu & Toma, 2012). Their impacts demand a prompt response from decision  
makers and the wider population, through the proper management of emergency situations (Vaugh & Streib,  
2006). In any disaster situation, one of the most important factors across all the disaster phases is public-private  
emergency cooperation for post-disaster accessibility and efficient intervention. By developing a model to  
harmonise this strong cooperation, Wiens et al. (2018) identify efficient ways to improve the logistics of these  
35 operations during crisis management.

Many areas of high seismic risk are urbanized and densely populated (Pollino et al., 2012; Vatsava et al.,  
2013). In addition, and coincidentally, many countries experiencing economic transitions are characterized by  
urban growth that is uncontrolled and, in large and medium-sized urban centres, such growth can be especially  
chaotic (Salvati, 2014). Thus, an increase in the human and economic cost of such disasters can be reasonably  
40 anticipated. Furthermore, many new buildings, new structures and, sometimes, newer pieces of infrastructure  
frequently fail to comply with the construction regulations established for areas of differing seismic  
vulnerability, especially when there are strong pressures for rapid development. Finally, the characteristically  
long time lags between pairs of strong earthquakes (Schweier & Markus, 2009) can dull public awareness of the  
potential impacts of such disasters, and render those in charge of emergency management complacent.

45 Earthquakes require a specific disaster planning approach (Armaş, 2008; Boştenaru Dan & Armaş, 2015).  
This is because, unlike disasters that can be anticipated in the short term (such as storms), there is little or no  
delay between the occurrence of the earthquake and the subsequent loss of life and property damage. Therefore,  
emergency response activities must be executed very quickly and efficiently (Wegscheider et al., 2013). For  
cities with a high earthquake risk, an important factor is public awareness of such events. This conditions the  
50 population towards the importance of quick response measures, which can help to reduce property damage and,  
more importantly, the number of casualties (Armaş & Avram, 2008). However, no matter how well organized  
the mitigation process, the disastrous effects of major earthquakes cannot be totally avoided (Momani & Salmi,  
2012).

Post-disaster recovery needs to transfer the most debated academic concepts (as disaster resilience, for  
55 example) into appropriate politics and transform it into real tools for an adequate planning. The governments  
have an important task to prepare the population and all stakeholders for future similar events (Comerio, 2014).

In recent years, seismic risk management has been more fully studied and developed so as to establish a series  
of priorities related to the rehabilitation of those buildings considered to be of major importance, including  
schools (Grant et al., 2007; Raffaele et al., 2013; Panahi et al., 2013), public institutions, historic buildings, and  
60 monuments (Grasso & Maugeri, 2009; Pessina & Meroni, 2009). Urban earthquake planning therefore needs to

**Comment [I.I.1]:** Authors' response to RC1 and RC2 (1)

**Comment [I.I.2]:** Adding a relevant issue – RC2 (1)

**Comment [I.I.3]:** Crowley et al., 2008 has been replaced by Grant et al., 2007, responding to suggestion of RC1

be more proactive (Boştenaru Dan et al., 2014) and there is a demonstrated requirement for coherent urban policies (Ianoş et al., 2017) to mitigate the inevitable occurrence of blockage points during emergency interventions.

65 In emergency situations, the key response element is rapid accessibility to places where possible casualties may be located. Timely intervention within the first two hours is critical in saving the wounded and in identifying the safest access routes for specific emergency equipment. As Fiedrich (2007) suggests, the disaster responses made during the first three days are fundamental. After that, the main goals are invariably rescuing trapped victims, and treatment of the injured, though ongoing fire control may also be required in some cases.

70 In general, natural hazard management includes the development of impact scenarios before the actual disasters occur (Bakillah et al., 2013). In this context, GIS techniques may be particularly useful in developing decision-making and response scenarios for potential earthquake disasters.

Our study shows that special attention should be paid to accessibility in the historic centres of large cities (Ianoş & Cepoiu, 2009). Historic city centres are characterized by intense pedestrian traffic and by a high proportion of attraction points (clubs, restaurants, hotels etc.) which result in high concentrations of people. 75 Since the core of the historic centre of Bucharest is characterized by a high number of buildings that were strongly affected by earthquakes in the last century, we can reasonably speculate that determining their accessibility in an emergency situation will facilitate quick intervention in areas where injured people, either direct casualties or victims of earthquake-related phenomena such as fires, gas accumulations or local flooding, are likely to be concentrated. The main objective of the study is to integrate geospatial data using thematic 80 mapping products with GIS techniques in order to provide seismic risk management solutions for Bucharest. We therefore seek to provide, concrete data and comprehensible information that can enable decision-makers to implement and prioritize their disaster management strategies. A similar study, based on different hazard scenarios and a deep analysis on social vulnerability in Bucharest, identifies the importance of fire stations, hospitals and parks in post-disaster situations (Armaş et al., 2016).

85 Unlike most studies of community response following an earthquake occurrence and the critical analysis of the emergency situations management generated thereby (Pollino et al., 2012; Wegscheider et al., 2013; Lu & Xu, 2014), the present study demonstrates the importance of GIS analyses in detecting potential congestion and inaccessibility issues in areas where buildings are most likely to collapse and accessibility issues are most likely to arise as a result of an earthquake.

**Comment [I.I.4]:** Authors' response to RC1 and RC2 (1)

**Comment [I.I.5]:** Adding a relevant reference - RC2 (1)

## 90 2 Case Study

Bucharest is Romania's largest city (with over two million inhabitants), the national capital, and one of the great metropolises of the Southeastern Europe (GROSEE-Espon project, 2014). Its urban evolution has been very rapid, largely occurring from the second half of the 19th century. Currently, the city occupies an area of 228 square kilometers, and possesses a housing stock predominantly consisting of multifamily apartment buildings, built  
95 during the communist period (Ianoş et al., 2016). Located about 135 km from the epicentre of the Vrancea seismic area (Lungu et al., 2000), in close proximity to the Southern Carpathian Mountains and at the junction of the Eastern European, intra-Alpine and Moesia plates (Mărmureanu et al., 2011), the city is extremely vulnerable to earthquakes. Indeed, in a classification of European metropolitan areas with respect to potential loss of life and damage to property, Bucharest is ranked second after Istanbul (Bala, 2014).

100 The historical record of Bucharest is replete with accounts of damaging earthquakes ever since the city's foundation (Tatevossian & Albin, 2010). The Vrancea seismic area is responsible for the highest seismic risk in Romania (Pavel et al., 2014; Ardeleanu et al., 2005). Over the past 76 years, Bucharest has been affected by four earthquakes with a magnitude of between 6.9 and 7.7 on the Richter scale (November 1940, March 1977, August 1986 and May 1990).

105 The study area for this paper is confined to central Bucharest, an area of approximately 8.33 square kilometers (Fig. 1). The oldest part of the city is situated in the south of this area, which comprises the historic centre (from the 16<sup>th</sup> and 17th centuries) and the central and northern parts dating from the 18th and 19th centuries. All four earthquakes mentioned above have impacted this case study area, with the most powerful being the earthquakes of 1940 and 1977. This sequence of earthquakes has had a cumulative effect, which explains the relative lack of  
110 buildings dating back more than 200 years.

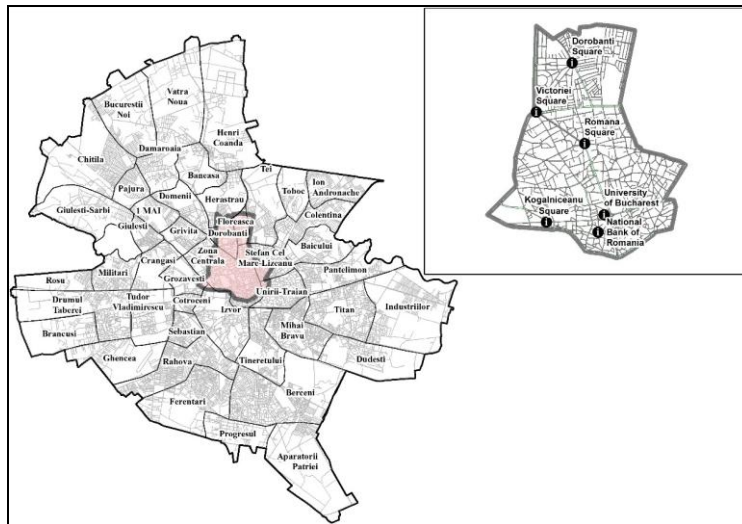

**Figure 1. Bucharest city and its surrounds**

The most serious problem is presented by the large number of buildings from the late 19th century within the historic centre, which has structurally degenerated over time and no longer meets the current building standards with regard to assessment of the ground motion levels for the Vrancea (Romania). Not only does Bucharest have a high level of exposure to earthquake hazards, it also suffers from poorly organized civil protection services and a low level of public awareness and education concerning these seismic risks (Armaş, 2006). Nevertheless, anticipation and anxiety are building, given the length of time that has passed since the 1977 major earthquake. In essence, there is a fear that the city will be no better prepared than it was in 1940 (Fig. 2a) or in 1977 (Fig. 2b). These figures show only a slight improvement in the standard of the disaster measures between the two dates and there is a growing recognition that greater levels of preparedness are needed.

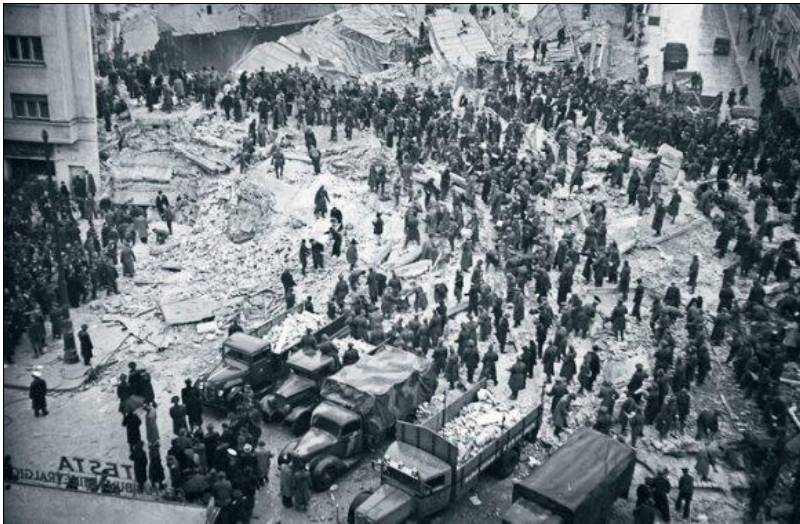

**Figure 2a. The collapse of the Carlton block in Bucharest in 1940.**

Source:

125 [https://ro.wikipedia.org/wiki/List%C4%83\\_de\\_cutremure\\_%C3%AEn\\_Rom%C3%A2nia#/media/File:Iosif\\_Berman\\_-\\_Marele\\_cutremur\\_din\\_anul\\_1940.jpg](https://ro.wikipedia.org/wiki/List%C4%83_de_cutremure_%C3%AEn_Rom%C3%A2nia#/media/File:Iosif_Berman_-_Marele_cutremur_din_anul_1940.jpg)

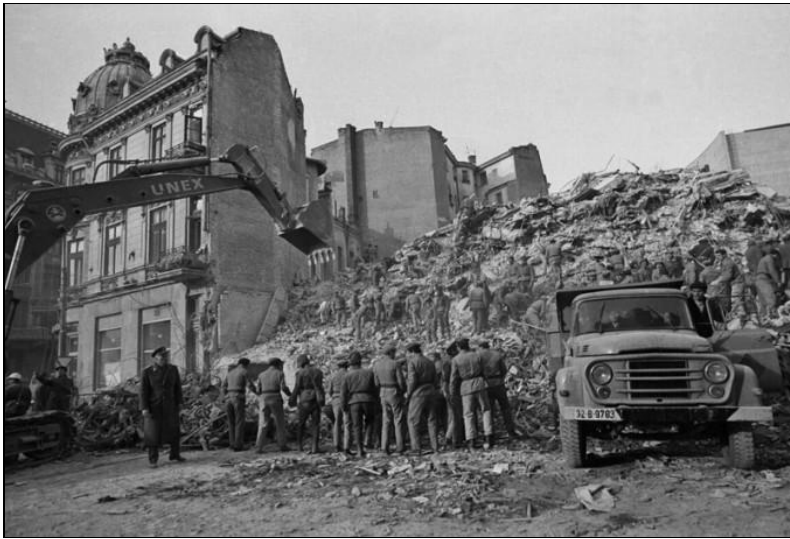

**Figure 2b.** The collapse of the Continental block in Bucharest's historical centre in 1977 blocked the access streets, so clearance was delayed by more than 12 hours.

130

Source: Agerpres

Immediately after the earthquake of 4 March 1977, with about 1700 victims (Török, 2017), the former regime announced the start of a rehabilitation project for the highly-degraded buildings within the central area, a project which was abandoned in less than a year. Many buildings, after being braced in position for 6-7 months with wooden or metal poles (which were later withdrawn), were then only "cosmeticized" and reoccupied. These decisions set a precedent for irresponsible policy that, unless it is addressed and altered, could have disastrous long-term consequences. Additionally, the growth of complacency over time has been a great enemy and a permanent state of vigilance is needed. Finally, there is a need for considerable public investment in mitigation in the areas most vulnerable to earthquakes. The lack of wider public awareness of the high seismic risk of these buildings (identified as a result of surveys conducted in and since the mid-90s) is evident in that the apartments in these 'cosmeticized' blocks are still the among the most expensive in the city due to their central location and spaciousness.

140

**Comment [I.I.6]:** It has been removed "the photograph shows efforts to identify victims and property", suggested by S. Boengiu

**Comment [I.I.7]:** Adding a relevant reference

Accordingly, the Romanian government has established a National Committee for Emergency Situations and a Department for Emergency Situations. The department coordinates the General Inspectorate of Emergency Situations. 41 local inspectorates, cover Bucharest city and the department of Ilfov. Bucharest city has three existing meeting points (two in Bucharest and other in Ciolpani village to the north) and there is a special strategy to bring in instantaneous support from 24 counties surrounding the city.

### 3 Data and Methods

This assessment of seismic hazard and vulnerability includes quantitative and qualitative data analysis that incorporates physical, environmental, social and economic factors, potential impacts from existing risk maps and estimates of the population that would potentially be affected (Mândrescu, 1990; Armaş, 2012; Rufat, 2013; Pollino et al., 2012). The accessibility analysis takes into consideration the specificities of each urban district, and especially the urban context, too (Noto, 2017).

#### 3.1 Data

The authors have used several data sets (buildings classified by seismic risk and emergency categories, i.e. the presence of hospitals, and fire stations) in order to provide a realistic depiction of the impact that a potential earthquake could have in the historical centre of Bucharest. Only those fire stations and hospitals within the municipal limits of Bucharest are included. The main data sources were provided by public institutions. Every year the Municipality of Bucharest publishes a technical report classifying buildings with relation to four seismic risk criteria, and three emergency criteria to assess their level of public safety. Table 1 shows the distribution of Bucharest's buildings by risk and emergency categories. Special attention is paid to the historic centre of Bucharest which contains the largest concentration of buildings which represent a public safety risk.

To represent the accessibility patterns prior and subsequent to an earthquake, it was necessary to digitize all elements of the transport infrastructure, construction, green spaces, alleys, sidewalks and property limits. Several different map sources were used to identify building locations including cadastral maps at scales of 1:500, IGFCOT, 1:2000 IGFCOT (1974-1975). Other map types and sources include old maps of Bucharest produced by the Topographic Military Directorate and orthophotomaps (2014) taken from the National Agency for Cadastre and Real Estate Advertising. The authors have overlaid accessibility patterns on a numerical model of the land, given the absence of natural barriers, since the Bucharest municipality is located on a plain.



**Table 1. Building Condition Data for the Historic Centre of Bucharest**

(Number of Restored Buildings is at the historical centre level, and Fire stations and Hospitals at the municipality level). RI-RIV – Seismic Risk Categories; U1-U3 – Emergency categories.

|                                                                               | R I | R II | R III | R IV | U1  | U2  | U3  | Total |
|-------------------------------------------------------------------------------|-----|------|-------|------|-----|-----|-----|-------|
| Buildings with seismic risk in Bucharest                                      | 343 | 344  | 97    | 7    | 309 | 615 | 650 | 2,365 |
| Buildings with seismic risk in the historical centre of Bucharest             | 65  | 1    | 2     | 1    | 82  | 9   | 5   | 165   |
| Buildings with seismic risk in the core of the historical centre of Bucharest | 50  |      | 1     | 1    | 41  | 2   | 2   | 97    |
| Number of buildings restored to an adequate seismic standard                  | 17  |      |       |      |     |     |     |       |
| Fire Stations                                                                 | 13  |      |       |      |     |     |     |       |
| Hospitals                                                                     | 32  |      |       |      |     |     |     |       |

Source: *processed data using the List of Buildings with Seismic Risk, published by Bucharest Municipality ([http://amccrs.pmb.ro/docs/Lista\\_imobilelor\\_expertizate.pdf](http://amccrs.pmb.ro/docs/Lista_imobilelor_expertizate.pdf), accessed at October 15, 2017)*

### 180 3.2 Methods

An important methodological contribution on the capacity of a city to resume urban functions after a seismic event is the study by Goretti et al. (2014) on how the Crotona urban system could better respond to such disasters. This study shows the importance of rapid accessibility to collapsed buildings and to injured people. Our study therefore emphasizes the importance of immediate accessibility for emergency intervention mechanisms, and the need to provide information to facilitate the proactive actions of decision-makers, who need clear and straightforward directions.

The main methodological steps in mapping accessibility in the central area of Bucharest were : a) setting up a referenced database of all the buildings with seismic risk; b) transferring this information to a detailed map of the identified buildings; c) identifying indicators of building density and age, and traffic (including pedestrian)intensity ; d) showing the locations of all hospitals, and fire stations; e) calculating present-day

(before a possible earthquake) accessibility levels; f) identifying specific locations of potential congestion resulting from the collapse of buildings included in the highest risk class; g) determining, by simulation, the immediately inaccessible or poorly accessible areas for the intervention crews in case of an earthquake occurrence, taking into account those buildings that might collapse if an earthquake occurs.

195 In the scientific literature, "access" is mainly measured as a physical distance or travelling time (Sotoudehnia & Comber, 2011). In this study, mapping the accessibility of the central area of Bucharest was completed using GIS techniques incorporating spatial analysis. The calculation of accessibility was initially based on the geometric structure of the public transport network (busses, trams and underground services), but not on the walking and cycling networks, which, although they have been included in other studies, are less amenable to emergency service access in this context (Graeme & Aylward, 1999; Parker & Campbell, 1998; Naphtali, 2006; Svansson, 2010; Weiping & Chi, 2011; Sotoudehnia & Comber, 2011; ESPON TRACC Interim Report, 2013; ESPON GROSSE, 2013; Blandford et al., 2012; Coffee et al., 2012; Yiannakoulis et al., 2013; Vojnovic et al., 2014).

205 The Kernel Density tool was used to calculate the density of point and line features in a neighborhood around those networks. After modeling the road network using the ArcGIS Network Analyst extension, the authors used an assortment of analytical tools. These included the New Route tool to check the road network; the New Closest option to determine the closest emergency facility (hospital, fire station) to each point; and the New OD matrix function to determine optimal routes (depending on road distance and travel time) following the principle of the shortest possible route to establish links between each pair of points.

210 To highlight accessibility in the most comprehensive way, the street structure (which is very dense in the historic centre where the streets are narrow) and road traffic density had to be taken into account. Accessibility was calculated as a function of the distances between different buildings areas and hospitals and of the time necessary for these movements (using isochrones). Isochrones maps, showing travel times by public transport from the city centre, had been used to assist in urban transport planning in the 1950s (Kok 1951, Rowe 1953 quoted by O'Sullivan, et al., 2000). These isochrones were generated using geographic information systems (GIS).

220 In addition, the Kriging Kernel interpolation calculation and local polynomial interpolation were used. For exact interpolation, the inverse distance weighted (IDW) method was used. These methods identified support elements for more proactive management that have the potential to bring about a decrease in both the material damage and the human casualties resulting from a strong earthquake. Using a database in a GIS environment enabled an assessment and estimation of the potential damage that could be caused by such an event. At the

**Comment [I.I.8]:** The phrase has been reformulated, answering to RC2 (2)

**Comment [I.I.9]:** The following phrase has been removed: "Accessibility was also calculated to take into account the presence of specific service locations which could exacerbate the impact of potential disasters, such as gas stations and electric transformers (Rezaie & Panahi, 2015)" (RC2 (3))

same time, GIS is a valuable method of analysis for this purpose because the databases can be regularly updated, allowing for ongoing mapping of the changing risk scenarios and the updating or reassessment of potential damage. The risk scenarios also provide useful identification of the vulnerable areas and population groups  
225 (Sinha et al., 2008).

The penultimate methodological step was to identify likely congestion locations. The initial simulation assumed that all the buildings categorized as possessing the highest degree of risk would collapse. For the core of historical centre, this permitted the identification of some important sites and street segments, which would be blocked in the case of a strong earthquake using the location of each highest risk building, their age, and  
230 number of floors and the local configuration of the street network.

Our intention is not to propose a precise correlation between the vulnerability of buildings (based on all their characteristics) and the intensity of the next earthquake. Rather, especially by taking into account that some of buildings in this area have partially collapsed in the absence of a direct seismic cause; we contend that an earthquake of similar magnitude to the 1977 event would produce outcomes comparable to our simulation. .

235 From this information several maps were developed taking into account the region's particular seismogenic characteristics (Mäntyniemi et al., 2003). Two offer general images of accessibility at the city level closely correlated with the territorial distribution of fire stations and hospitals. Another identifies areas or street segments potentially isolated by building collapses.

**In the recent years, the scientific approaches on risk reduction of natural events, as earthquakes use resilience, as an important concept, which could offer new theoretical and practical tools for a better civil protection (Fekete and Fiedrich, 2018). Using this concept, the scientists pave the way for revigoration the expectations, by joint actions with decision-makers and people (Anhorn, 2018). These ideas ask, maybe, other complementary issues connected with a higher accessibility to the affected areas.**

Our approach, focusing on the single issue of accessibility in a situation of crisis management, shows  
245 empirically how GIS technologies can be used to make recommendations to authorities to improve their preparedness levels and response speeds in post-earthquake interventions. Within this study, GIS is used solely as a tool to identify accessibility as a starting point for disaster management (Nushi & van Loenen, 2013). These GIS solutions are demonstrably important applications in relation to the first two phases (risk mitigation and disaster preparedness) of Alexander's (2002) four-phase sequence of emergency management activities,

**Comment [I.I.10]:** New added phrases at the suggestion of RC1 to update the literature on the topic

250 **4 Results**

It is necessary to simulate emergency interventions prior to the occurrence of catastrophic events because, in the local situation, the inherited intra-urban structure, with a narrow winding street pattern dating back to medieval times, the poor structural condition of many of the buildings, and limited access to important points from the emergency response activity locations are all of critical importance.

255 In such a context, accessibility to specific disaster sites is critical and this requires that urban areas of this nature be treated with special attention. The biggest challenge may be caused by traffic congestion compounded by debris, which can isolate critical areas, making rapid intervention to put down fires and save human lives impossible.

The official identification of buildings with a high seismic risk combined with precise mapping of their  
260 location can be related to the density of road traffic in the historic areas (Fig. 4). If traffic is very high on the main access streets this could inhibit rapid intervention, especially in a situation general panic such as that generated by a potential earthquake. It would also be difficult to use narrow streets, where the pedestrian traffic and partially collapsed buildings could block the access of emergency service vehicles. In this context, there is a need for proactive measures, to mitigate the risk of late arrival of assistance at the affected buildings.

265 **Fig.3 has been removed**

The most important area of the historical centre is the one delimited by Armenească, Moșilor, and Călărași streets, Splaiul Independenței, Calea Victoriei, and Carol and Regina Maria boulevards. Within this area, the building density exceeds 2.5 units / hectare and, in some places, even 10 units / hectare. In the areas of the highest density, most of the buildings have two or three floors, and, because of their uncertain legal status after  
270 1990, many exhibit an advanced and increasing degree of dilapidation. Restoration and reinforcement of these buildings by both public authorities and private entrepreneurs is only proceeding at a maximum rate of 2 buildings per year.

**Comment [I.I.11]:** Splitting the “Results and discussion” section, we have individualised the “Results” and “Discussion” sections – RC2 (8)

**Comment [I.I.12]:** This map has been removed - RC2 (5)

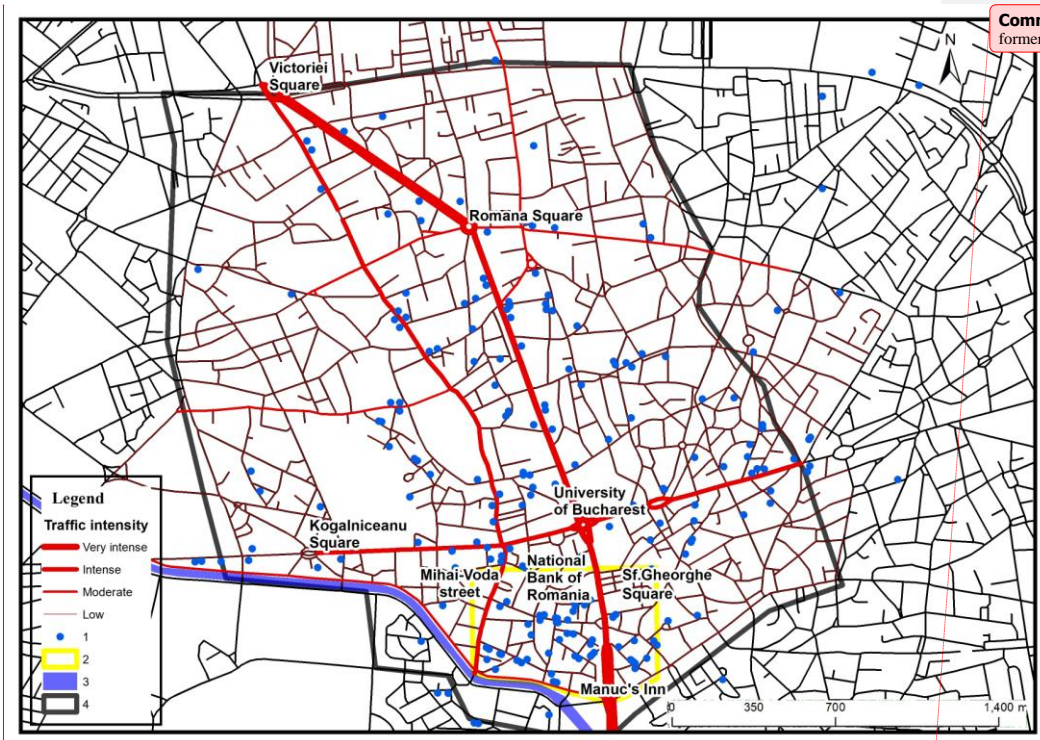

**Comment [I.I.13]:** This map has replaced the former one, responding to the suggestion of RC2 (6)

275 **Figure 4.** Road traffic intensity and the location of buildings with a high seismic risk. 1. Building; 2. Core of the historic centre; 3. Dâmbovița River; 4. Study area.

280 The number of buildings with the highest seismic risk (computed with Kernel Density tool) shows a very high concentration in the historical centre of Bucharest (Fig. 5). Looking at a map of seismicity at the level of Bucharest, it becomes obvious that the inherent risks from earthquake damage are greatest in central Bucharest, including the historical centre (Rufat, 2011). Even though most of the buildings located in the historical centre date from the early 20th century, they were built on the foundations of 19th century structures (Armaş, 2008).



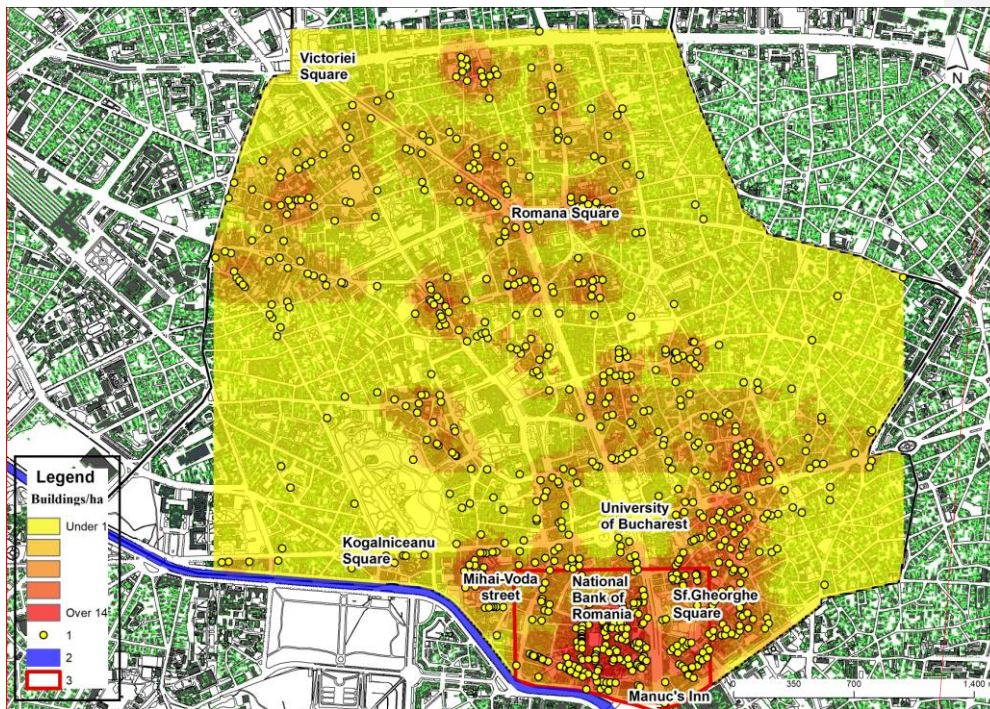

**Comment [I.I.14]:** This map has replaced the former one, responding to the suggestion of RC2 (6)

285 **Figure 5. Density of buildings with a major seismic risk.** 1. Building; 2. Dâmbovița River; 3. Core of the historic centre

To highlight the anticipated degree of access for fire protection and ambulance services in the central area, accessibility levels prior to an earthquake were calculated and later compared to a post-earthquake scenario.

290 Taking into account the location of the fire stations and hospitals, and the street tram network, the access routes, into and within the study area were evaluated using as a Network Analysis tool. Thus we identified the shortest routes from the closest emergency facilities (fire stations and hospitals) to all locations in the study area, using the Bellman-Kalaba algorithm. These minimal road applications were applied for various types of emergency service, such as transport, ambulance, fire, police etc.

295 It was noted that both fire-fighting and ambulance service accessibility were high or very high for most parts  
of the capital city, including the downtown area, which is especially well served by fire-fighter and ambulance  
services. There are 13 large fire stations in Bucharest. However, the lowest levels of potential accessibility by  
fire services to individual houses in Bucharest city, occurred in the historic centre area, mainly due to the  
configuration of the street pattern (Fig. 6). The lowest values were registered in an area between Calea Victoriei,  
300 Doamnei Street, Brătianu and Splaiul Independenței, in the core of the historic centre. Low values occur to the  
East of Bratianu Boulevard, even though some important access axes (Armenească, Calea Moșilor, Hristo  
Botev, Negustori) are located nearby. Overall, if fires broke out at several different points in the historic centre  
core during a seismic event, this would present huge problems.

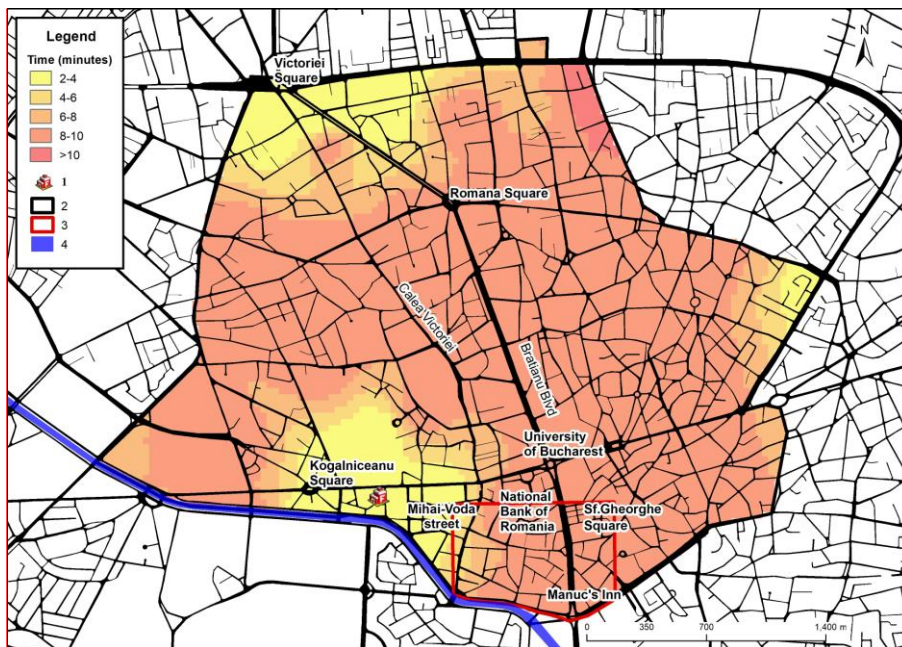

305 **Figure 6. Fire fighting accessibility levels within the study area.** 1. Fire station; 2. Study area; 3. Core of the  
historic centre; 4. Dâmbovița River

**Comment [I.I.15]:** This map, focused on the study area, has replaced the former one, accepting the suggestion of RC2 (7)



The map of ambulance accessibility (Figure 7) presents a very similar picture. However, access is better in the northern part of historic centre due to the location of Colţea Hospital. Figure 7 shows two areas where it would be difficult for ambulances to arrive in a timely manner, one in the core of historical centre and the other in the surrounds of Mihai Vodă Street, which would be accessed by ambulances from University Hospital.

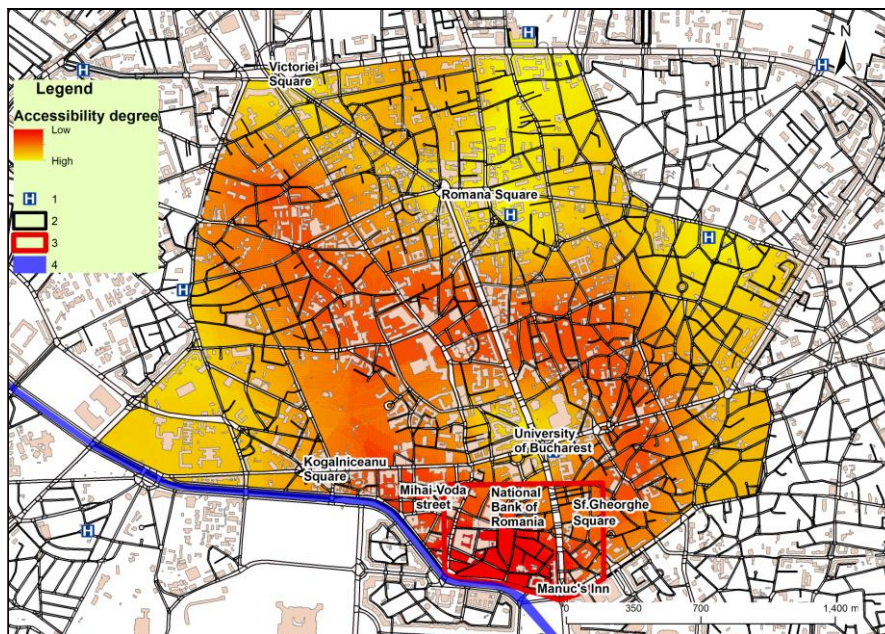

**Figure 7. Ambulance accessibility levels within the study area.** 1. Hospital; 2. Study area; 3. Core of the historic centre; 4. Dâmbovița River.

## 315 **5 Discussion**

Should an earthquake occur, an important consideration is the challenge presented by building collapses which obstruct road access. Identifying individual buildings with the highest levels of seismic risk highlighted the possibility of concentrated building collapses in certain locations within the historic centre. In these the locations, some buildings would become isolated and rapid intervention by fire or ambulance services would be impossible.

320

**Comment [I.I.16]:** This map, focused on the study area, has replaced the former one, accepting the suggestion of RC2 (7)

**Comment [I.I.17]:** Splitting the "Results and discussion" section, we have individualised the "Results" and "Discussion" sections – RC2 (8)



This general analysis indicates that the central area seems to be favoured due to the possibility of intervention from several emergency service points into this part of the city. However, and in spite of this, pedestrian and vehicular congestion is highly likely to inhibit rapid access by fire-fighters and ambulances in several areas within the central district. Also, several locations in the downtown area, which previously appeared to have high emergency accessibility levels, were shown to possess high probabilities of multiple building collapses. These events could well obstruct access by emergency vehicles, despite the high levels of accessibility that were identified initially.

Should an earthquake with a magnitude of over 7 degrees on the Richter scale occur, fires would present a major associated risk. The majority of the city centre buildings is of timber construction or possesses many timber components (some buildings from “Şelari” “Crama Domneasca”; “Covaci” and “Smârdan” streets, for example). These buildings characteristically house restaurants, cafes or pubs, which contain huge quantities of furniture, a further important source of fire. If emergency action does not occur promptly, in such locations, the probability of numerous fatalities is high. In addition, water supply and sewerage systems may be damaged, resulting in basement and ground floor flooding. It would therefore be advisable to provide supplementary emergency response materials at a large number of locations within this district. This would allow access to such equipment at the local scale as an alternative to the provision of emergency materials and services from elsewhere which may be unobtainable in the event of an emergency.

Assuming that, in the event of a large-scale disaster, certain clusters of buildings may become isolated and inaccessible to emergency services it is therefore recommended that smaller scale aid stations be established within these districts. These smaller scale aid stations could then provide critical assistance in areas isolated by building collapses.

An in-depth and more detailed study of a portion of the general study area close to several buildings of national importance (the Parliament building, the headquarters of several ministries and other public institutions) since the location of emergency services may be oriented to the protection of these public institutions, rather than to the provision of services to areas with high densities of buildings with high seismic risk.

The map which shows both the distribution of the highest seismic risk buildings and the location of the nearest fire stations (Fig. 8), illustrates the need for greater proximity (and hence access) of fire stations to the two areas of maximum density of highest risk buildings: one in the Lipscani area and the other in the Bărăţiei area. The Western area (Griviţa - Gara de Nord) could be placed under the authority of the two existing fire stations. These areas of high vulnerability should be connected to a permanent emergency water supply (since

the normal water sources would be disrupted by an earthquake). They should also possess a minimum, yet sufficient, level of equipment for a local first response.

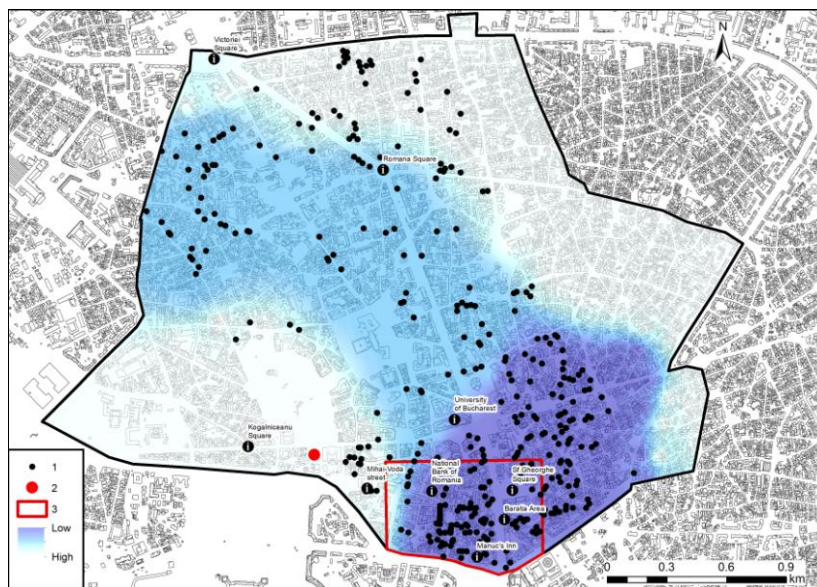

355 **Figure 8. The accessibility of buildings with high seismic risk to fire fighting services after a potential earthquake occurrence. 1. Building; 2. Fire station; 3. Core of the historic centre**

360 The location of hospitals again appears to be favourable at first glance (Fig. 9), but their capacity should be assessed against the probable number of casualties, which could reach as high as 11,000. The earthquake of 1940 registered 1,271 and the 1977 earthquake 11,321 injured persons (Pavel & Văcăreanu, 2015). The location of the Hospital Colțea suggests that the majority of injured persons would go there for immediate treatment. However, this hospital only possesses a small surgical unit (with three operating theatres) and it would be unable to offer emergency medical assistance to a large number of persons over a short period.

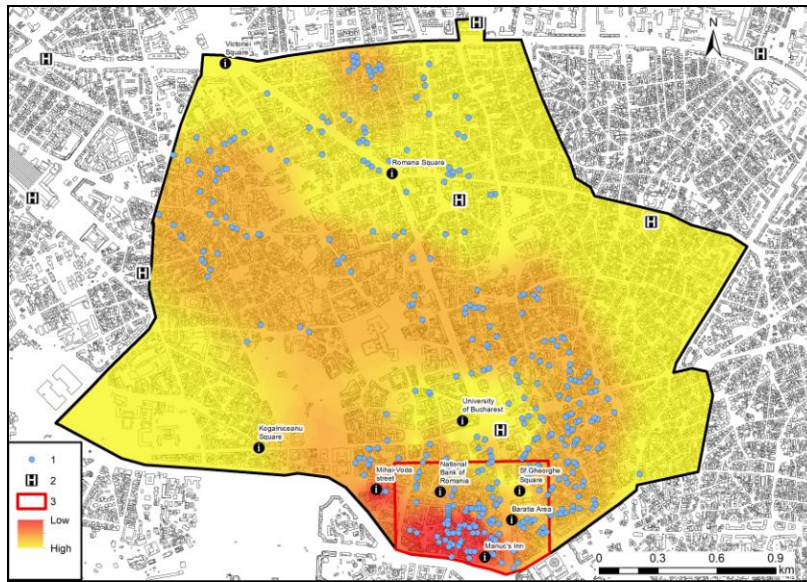

365

**Figure 9. The territorial distribution of hospitals in the central area and their relationship to buildings with a high seismic risk. 1. Building; 2. Hospital; 3. Core of the historic centre**

To increase the efficiency of emergency response, the location and number of potential casualties must be more precisely determined. Consider needs to be given to the availability of specific medical services at individual hospitals and other medical facilities. The provision of surgical wards, imaging laboratories, and orthopaedic facilities is more uneven than the provision of hospitals more generally across the city. Depending on the territorial distribution of these specific hospital services, the buildings with highest seismic risk should be assigned to specific emergency hospital services so that accessibility levels can be maximized. Obviously, this implies the designation of dynamic territorial structures, which, depending on the gravity of the reported seismic events and their human consequences, would include access to other hospitals at greater distances from the central area (Toma-Dănilă, 2013).

375

There are some studies on fire fighting simulation outside of historical centre of Bucharest, in the Magheru Blvd (for example), which relevel the importance given to this related phenomenon with an earthquake event

380 (Fiedrich, 2007). In the event of a powerful earthquake, a partial or even total breakdown of communication systems is likely. This eventuality would cause many people to make direct contact with friends and relatives by moving around the city by car. Rapid intervention by the traffic police will be vital to minimize congestion in those areas of the city where the need for emergency intervention is greatest.

The unpredictable nature of this phenomenon may well lead to traffic bottlenecks at unanticipated locations along the transportation network, which in turn would further complicate rescue, relief, and evacuation efforts. In these circumstances, communication systems between those who would be mapping the collapsed or damaged buildings and those who would be ensuring the traffic flow need to function as smoothly as possible in order to allow the wounded to be transported to hospitals and the fire engines to move towards critical spots in the city. Where the simultaneous collapse of buildings, especially in the medieval area of the city, made rapid intervention impossible, lifesaving equipment, individually transported by specially trained persons, would be needed provide immediate assistance.

Our study has sought to demonstrate what could happen in the core of historic centre (Fig. 10), taking into consideration the likely collapse of buildings classified as Risk 1 (R1). Any future earthquake of more than 7.2 on the Richter scale (the level of the strongest recent earthquake on March 4<sup>th</sup>, 1977) would pose an amplified danger of the collapse of buildings in critical locations. We define critical locations, as those where building collapse, could block access to specific areas or street segments.

These potential blockages are most likely to occur in 5 areas, identified in Fig 10 as A, B, C, D, E. *A* (Blănari area) is small and is delimited by building no.2 (built in 1865, 3 floors), and the buildings from no. 9 (1880, 5 floors) to no.14 (1935, 6 floors). *B* (Lipscani-Gabroveni area) is the largest site, and contains a group of 15 vulnerable buildings. Possible street blockages could be produced by the collapse of buildings on Lipscani Street, such as no.26 (1864, 5 floors) or no.29 (1934, 9 floors), and no.76 (1906, 4 floors), and on Gabroveni Street no.2 (1940, 9 floors) and no.12 (1924, 6 floors). Two other areas, *C* and *D*, are located on Franceză Street between buildings no.6 (1869, 5 floors) and no. 22 (1900, 6 floors), no. 30 (1870, 5 floors) and no. 42 (1870, 5 floors). On the West side of the main boulevard Brătianu, *E* area (Bărăției) contains the buildings no. 8 – Baia de Fier Street (1930, 5 floors) and no. 37 (1870, 3floors) and no.50 (1824, 4 floors) Bărăției street.

A final consideration is that, for much of the day, the core of the historic centre normally contains between 1,000 and 5.000 visitors in addition to the area's residents and workers. This only adds to the need to devise proactive earthquake intervention and mitigation strategies.

410

**Comment [I.I.18]:** The authors added this new phrases, responding to suggestion of RC1

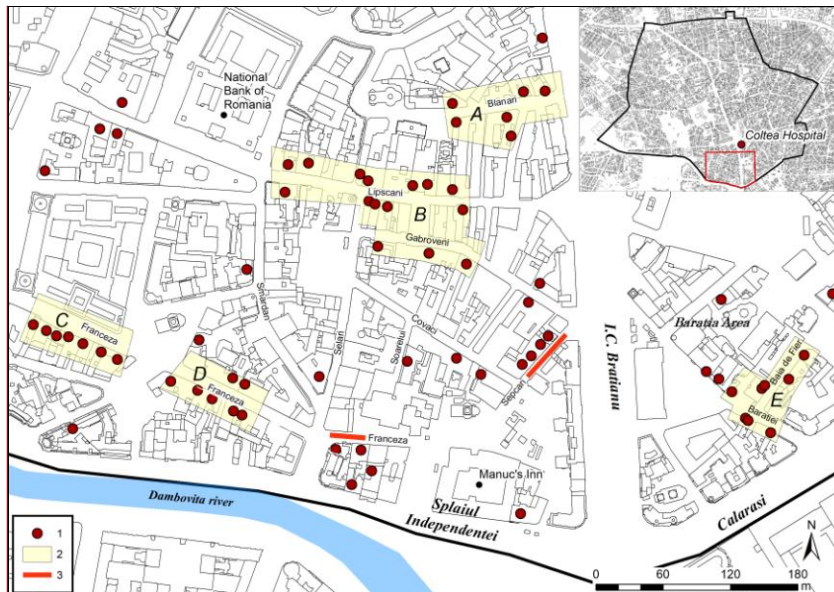

**Comment [I.I.19]:** This map, making more visible the morphological configuration, has replaced the former one, accepting the suggestion of S. Boengiu.

**Fig.10. The anticipated spatial effects of building collapse in a similar earthquake to that of March, 1977.**

1. Building in the first category of Risk (R1);
2. Isolated areas resulting from the hypothesis that all buildings belonging to the R1 class would collapse;
3. Blocked street segments.

415

We therefore suggest the following proactive measures to mitigate the risks associated with a seismic disaster in Bucharest city, and especially within the core of the city's historic centre:

- the constitution of a technical team of decision-makers to identify optimal response strategies for a future earthquake. The main task of this team would be to identify the critical points and areas for emergency intervention in the most congested areas (Tuns et al., 2013).

420

- the prioritization of building consolidation, correlated with the buildings' locations and their potential to block street segments and critical access routes in the event of their collapse ;

- the re-evaluation of the number and locations of fire stations

- the development of a system of emergency medical aid posts within the historic centre, taking into account

425

both the area's access problems and the fluctuating population of the area resulting from its entertainment role.

- reorganization of the "Colțea" Hospital, including the expansion of its infrastructure (especially the surgical section, and the number of operating theatres). This hospital should become the most important point of emergency intervention in the historic centre of Bucharest in the event of a strong earthquake.

#### 430 **6 Conclusions**

This study demonstrates that GIS can be used effectively as an analytical and decision making tool in planning for hazard mitigation. GIS, properly employed, can provide information concerning emergency response accessibility in areas where physical structures are degraded and pose a higher risk of collapse. Such knowledge is critical in anticipating the impact of a disaster. Injury, loss of life, and damage to property can be  
435 minimized through more effective and rapid emergency response.

In Europe, Bucharest ranks second, after Istanbul, in its exposure and risk related to earthquakes. It is not enough to be familiar with the distribution of the high seismic risk buildings. Emergency intervention is also vital to minimize the consequences of such an event. In order to save lives, knowledge of accessibility levels and related rapid intervention potential is essential in the event of an earthquake. However, the current status  
440 and priorities of natural hazard and emergency response planning in the city of Bucharest (and at the national scale), are such that they are unlikely to mitigate the effects of a potential disaster to a sufficient extent. Across several measures – the training of specialists, public awareness and education, infrastructural improvements, and building improvements – current efforts are inadequate.

The passivity of urban decision-makers in relation to the very large number of buildings in the highest risk  
445 class perhaps the most surprising element here. These buildings are concentrated in the most populated and attractive areas of the city in terms of leisure and entertainment. Even if Bucharest's inhabitants are partially aware of this risk, the vast majority of tourists are unlikely to realize what could happen should an earthquake occur.

The most recent major disaster event that took place in Bucharest, the fire in the „Collectiv” Club on the night  
450 of October 30, 2015, which led to the deaths of 63 people and serious injury to around 150, brought the major risk that an earthquake can pose to the attention of the local and national authorities. In response, a ban was imposed on all shops, restaurants and clubs operating in buildings with high seismic risk, but there are not enough resources to refit the high risk buildings that continue to be inhabited. This event reminded the population and the authorities that an earthquake event or disaster of similar scale will occur again at some point

455 and that it is necessary to have a clearly defined policy that relies upon concrete measures to reduce the human  
and material losses.

Our study reveals both the importance of accessibility to buildings for emergency intervention, and the  
shortcomings in the current provision of major emergency response services. Our methodology, using simple  
tools, offers analysts and decision-makers a credible means of developing a proactive vision of and a  
460 management strategy for emergency response in congested, historic areas. GIS is a commonly used tool for  
analyses of this type and its results, since they can be expressed cartographically, can be more widely  
understood than is often the case when other statistical and computational techniques are employed.

**Author contributions.** CM and II designed the study. GM, CM and II established and set-up the maps. II, CM,  
465 RJ, GM and GP analysed and interpreted the results. II and CM wrote the paper with substantial input from all  
co-authors. RJ revised the English.

**Competing interests.** The authors declare that they have no conflict of interest.

470 **Acknowledgements.** This work has been partially supported by the Project UB 2008.

## References

- Alexander, D.: Principles of emergency planning and management. Oxford: Oxford University Press, 2002.
- Anhorn, J.: Nepal and the “Urban Resilience Utopia”, in Editors: Fekete A., Friedrich F (eds), 2018, Urban  
Disaster Resilience and Security, pp. 13-26. The Urban Book Series, Springer, 2018.  
475 <https://doi.org/10.1007/978-3-319-68606-6>.
- Ardeleanu, L., Leydecker, G., Bonjer, K.-P., Busche, H., Kaiser, D., and Schmitt, T.: Probabilistic  
seismic hazard map for Romania as a basis for a new building code. Nat. Hazards Earth Syst. Sci., 5, 679-684,  
2005.
- Armaş, I.: Earthquake perception in Bucharest, Romania, Risk Analysis, 26, 1223-1234, 2006.
- 480 Armaş, I., and Avram, E.: Patterns and trends in the perception of seismic risk. Case study: Bucharest  
Municipality/Romania, Nat. Hazards, 44, 147-161, 2008.
- Armaş, I.: Social vulnerability and seismic risk perception. Case study: the historic centre of the Bucharest  
Municipality/Romania, Nat. Hazards, 47, 397-410, 2008.
- Armaş, I.: Multi-criteria vulnerability analysis to earthquake hazard of Bucharest, Romania, Nat. Hazards, 63,  
485 1129-1156, doi: 10.1007/s11069-012-0209-2, 2012.

Comment [I.I.20]: New reference (RC1)



- Armaş, I., Ionescu, R., Gavriş, A., and Toma-Dănilă, D.: Identifying seismic vulnerability hotspots in Bucharest, *Appl. Geogr.*, 77, 49-63, 2016.
- Atanasiu, G. M., and Toma, A.-M.: On seismic vulnerability evaluation in dense urban residential areas using spatial information system SIS. *Proc. ASTR Annu. Conf. Acad. Tech. Sci. Rom.*, pp. 114-121, Agir Publishing House, Bucharest, 2012.
- 490 Bakillah, M., Domínguez, J. A., Z. A., Liang, S. H. L., and Mostafavi, M. A.: Multi-agent evacuation simulation data model with social considerations for disaster management context, in: *Intelligent systems for Crisis management. Geo-information for Disaster Management (Gi4DM)*, edited by Zlatanova, S., Peters, R., Dilo, A., and Scholten, H., pp. 3-18, Springer-Verlag, Berlin Heidelberg, 2013.
- 495 Bala, A.: Quantitative modelling of seismic site amplification in an earthquake-endangered capital city: Bucharest, Romania, *Nat. Hazards*, 72, 1429-1445, 2014.
- Blandford, J. I., Kumar, S., Luo, W., and MacEachren, A. M.: It's a long, long walk: accessibility to hospitals, maternity and integrated health centres in Niger, *Int. J. Health Geogr.*, 11, 1-15, 2012.
- Boştenaru Dan, M., and Armaş, I.: Earthquake impact on settlements: the role of urban and structural morphology, *Nat. Hazards Earth Syst. Sci.*, 15, 2283-2297. doi: 10.5194/nhess-15-2283-2015, 2015.
- 500 Boştenaru Dan, M., Armaş I., and Goretti, A.: Earthquake Hazard Impact and Urban Planning – An Introduction, in: *Earthquake Hazard Impact and Urban Planning*, edited by Boştenaru Dan, M., Armaş, I. and Goretti, A., pp. 1-14, Springer, Dordrecht Heidelberg New York London, 2014.
- Coffee, N., Turner, D., Clark, R. A., Eckert K., Coombe, D., Hugo, G., van Gaan D., Wilkinson, D., Stewart S., and Tonkin, A.: Measuring national accessibility to cardiac services using geographic information systems, *Appl. Geogr.*, 34, 445-455, 2012.
- 505 Comerio, M.C.: Disaster Recovery and Community Renewal: Housing Approaches, *Cityscape: A journal of Policy Development and Research*, 16, 2, 2014.
- Crowley, H., Colombi, M., Pinho, R., Meroni, F., and Cassera, A.: Application of a prioritisation scheme for seismic intervention in school buildings in Italy, in: *14th World Conf. Earthq. Eng.*, Beijing, China. <ftp://ftp.ecn.purdue.edu/spujol/Andres/files/09-01-0097.PDF>, Oct. 12-17, 2008.
- Eshghi, K., and Larson, R. C.: Disasters: lessons from the past 105 years. *Disaster Prev. Manag.*, 17, 62-82, 2008.
- ESPON TRACC Project (Transport Accessibility at regional-local scale and patterns in Europe) 2013, Applied Research 2013/1/10, Final Report, 274 pp. [https://www.espon.eu/sites/default/files/attachments/TRACC\\_FR\\_Volume2\\_Scientific\\_Report.pdf](https://www.espon.eu/sites/default/files/attachments/TRACC_FR_Volume2_Scientific_Report.pdf), 2015.
- 515

**Comment [I.I.21]:** This reference has been removed



- ESPON GROSEE Project (Growth Poles in South-East Europe Emergence of Growth Poles Network in South-East of Europe). 2013. Applied Research 2013/2/19, Final Report-Scientific Report, 367 pp. <https://www.espon.eu/programme/projects/espon-2013/targeted-analyses/grosee-growth-poles-south-east-europe>, 2014.
- 520 Fekete, A. and Fiedrich, F.: Introduction to “Urban Disaster Resilience and Security – Addressing Risks in Societies”, in Editors: Fekete A., Fiedrich F (eds), 2018, Urban Disaster Resilience and Security, pp.1-12. The Urban Book Series, Springer, 2018. <https://doi.org/10.1007/978-3-319-68606-6>.
- Fiedrich, F.: An HLA-Based Multiagent System for Optimized Resource Allocation After Strong Earthquakes, 525 Simulation Conference, 3-6 Dec.,WSC 06, Proc. Winter, Monterrey, CA, USA, 2006, added to IEEE Xplore: 05 March 2007, DOI: [10.1109/WSC.2006.323120](https://doi.org/10.1109/WSC.2006.323120)
- Geis, D. E.: By design: the disaster resistant and quality of life community, Nat. Hazards, 1, 3, 151-160, 2000.
- Goretti, A., Vetta, S., Palmieri, F., Adamo, F., Berlingeri, M., and Palmieri, L.: The Urban System of Crotona, Italy, Facing the Earthquake Impact. in: Earthquake Hazard Impact and Urban Planning, edited by Boştenaru 530 Dan, M., Armaş, I. and Goretti, A.,pp.151-170, Springer, Dordrecht Heidelberg New York London, 2014.
- Graeme, H., and Aylward, R.: Using Geographical information system (GIS) to establish access to aged care residential services in non-metropolitan Australia. Proc. 5th Nat. Rural Health Conf., Adelaide, South Australia, [http://ruralhealth.org.au/PAPERS/5\\_gis.pdf#F](http://ruralhealth.org.au/PAPERS/5_gis.pdf#F), 14-17<sup>th</sup> March, 1999.
- 535 Grant, D.N., Bommer, J.J., Pinho, R., Michele Calvi, G., Goretti, A., and Meroni, F. (2007) A Prioritization Scheme for Seismic Intervention in School Buildings in Italy. Earthq. Spectra, 23, 291-314, 2007. <https://doi.org/10.1193/1.2722784>
- Grasso, S., and Maugeri, M.: The road map for seismic risk analysis in a Mediterranean city. Soil Dyn. Earthq. Eng., 29, 1034-1045, 2009.
- Ianoş, I., and Cepoiu, L.: The importance of intraurban structures of the Romanian cities for crisis and 540 emergency situations management, Rom. Rev. Polit. Geogr., 11, 2, 19-29, 2009.
- Ianoş, I., Sîrodoev, I., Pascariu, G., and Henebry, G.: Divergent patterns of built-up urban space growth following post-socialist changes, Urban Stud., 53, 3172-3188, 2016.
- Ianoş, I., Merciu, C., and Sorensen, A.: Incoherence of urban planning policy in Bucharest: Its potential for land use conflict. Land Use Pol., 60, 101-112, 2017.
- 545 Lu, Y., and Xu, J.: The progress of emergency response and rescue in China: A comparative analysis of Wenchuan and Lushan earthquakes, Nat. Hazards, 74, 421-444, 2014.

**Comment [I.I.22]:** New added reference according with suggestion of RC1

**Comment [I.I.23]:** New added reference according with suggestion of RC1

**Comment [I.I.24]:** New added reference according with suggestion of RC1

- Lungu, D., Aldea, A., Arion, C., and Baur, M.: Vulnerability of existing building stock in Bucharest, Proc. 6th Intern. Conf. Seismic Zonation, pp. 837–846, Palm Springs, California, Nov.12-15, 2000.
- Mândrescu, N.: Data Concerning Seismic Risk Evaluation in Romania, Nat. Hazards, 3, 249-259, 1990.
- 550 Mărmureanu, G., Cioflan, C. O., and Mărmureanu, A.: Intensity seismic hazard map of Romania by probabilistic and (neo)deterministic approaches, linear and nonlinear analyses, Rom. Rep. Phys., 63, 226-239, 2011.
- Mäntyniemi, P., Márza, V. I., Kijko, A., and Retief, P.: A new probabilistic seismic hazard analysis for the Vrancea (Romania) seismogenic zone, Nat. Hazards, 29, 371-385, 2003.
- 555 Momani, N. M., and Salmi, A.: Preparedness of schools in the province of Jeddah to deal with earthquakes risks, Disaster Prev. Manag., 21, 463-473, 2012.
- Naphtali, Z. S.: Delivering health-care services to an urban population, in: Maantay J., Ziegler, J. (eds.), GIS for urban environment, edited by Maantay, J. and Ziegler, J., pp. 341-347, ESRI Press, Redlands, California, 2006.
- 560 Noto, G.: Combining system dynamics and performance management to support sustainable urban transportation planning, J. Urban Reg. Analysis, IX, 51-71, 2017.
- Nushi, B., and van Loenen, B.: The STIG: Framework for the stress-test for infrastructures of geographical information, in: Intelligent systems for Crisis management. Geo-information for Disaster Management (Gi4DM), edited by Zlatanova, S., Peters, R., Dilo, A., and Scholten, H., pp. 289-298, Springer-Verlag, Berlin Heidelberg, 2013.
- 565 O’Sullivan, D., Morrison, A., and Shearer, J.: Using desktop GIS for the investigation of accessibility by public transport: an isochrones approach. Int. J. Geogr. Inf. Sci., 14, 85-104, 2000.
- Panahi, M., Rezaie, F. and Meshkani, S. A.: Seismic vulnerability assessment of school buildings in Tehran city based on AHP and GIS, Nat. Hazards Earth Syst. Sci., 1, 4511-4538, 2013.
- 570 Parker, E. B., and Campbell, J.L.: Measuring access to primary medical care: some examples of the use of geographical information systems. Health Place, 4, 2, 183-193, 1998.
- Pavel, F., Văcăreanu, R., Ionescu, C., Iancovici, M., and Șercăianu, M.: Investigation of the variability of strong ground motions from Vrancea earthquakes, Nat. Hazards, 74, 1707-1728, 2014.
- Pavel, F., and Văcăreanu, R.: Assesment of the ground motion levels for the Vrancea (Romania). November 575 1940 earthquake, Nat. Hazards, 78, 1469-1480, 2015.

- Pollino, M., della Rocca, A. B., Fattoruso G., La Porta L., Lo Curzio S., Arolchi A., James, V., and Pascale, C.: Open Source GIS tools to map earthquake damage scenarios and to support emergency. *GEOProcessing: The 4<sup>th</sup> Intern. Conf. Adv. Geogr. Infor. Sys., Appl. Serv.*, pp. 152-157, 2012.
- Pessina, V., and Meroni, F.: A Web GIS tool for seismic hazard scenarios and risk analysis, *Soil Dyn. Earthq. Eng.*, 29, 1274-1281, 2009.
- 580 Raffaele, D., Mezzina, M., and Tosto, A.: Instructions overview on the regional scale analysis of school buildings in Puglia (Italy), in: *ECCOMAS Thematic Conf. Comp. Meth. Struct. Dyn. Earthq. Eng.*, edited by Papadrakakis, M., Papadopoulos, V., and Plevris, V., 2014. doi: 10.7712/120113.4801.C1239.
- Rufat, S.: *Transition post-socialiste et vulnerabilité urbaine à Bucarest*, Bucharest: University of Bucharest Publishing House, 2011.
- 585 Rufat, S.: Spectroscopy of urban vulnerability, *Ann. Assoc. Am. Geogr.*, 103, 505-525, 2013.
- Salvati, L.: Urban growth and the spatial structure of a changing region: an integrated assessment, *J. Urban Reg. Analysis*, 6, 5-14, 2014.
- Schweier, C., and Markus, M.: Expert and information system for technical SAR measures and buildings' state evaluation, *Nat. Hazards*, 51, 525-542, 2009.
- 590 Sinha, R., Aditya, K.S.P., and Gupta, A.: GIS-based urban seismic risk assessment using risk, *J. Earthq. Tech.*, 45, 3-4, 41-63, 2008.
- Sotoudehnia, F., and Comber, L.: Measuring perceived accessibility to urban green space: an integration of GIS and participatory map, in: *Proc. 14<sup>th</sup> AGILE Conf. Geogr. Inf.: Adv. Geoinf. Sci. Changing World*, [https://agile-online.org/conference\\_paper/cds/agile\\_2011/contents/pdf/shortpapers/sp\\_148.pdf](https://agile-online.org/conference_paper/cds/agile_2011/contents/pdf/shortpapers/sp_148.pdf), 2011.
- 595 Svensson, J.: Accessibility in urban areas for citizens with impairments: using GIS to map and measure accessibility in Swedish cities, in: *Universal Design: emerging research and developments*, edited by Maisel, J.L., pp. 122-131, Bentham Publishing House, New York, 2010.
- Tatevossian, R., and Albin, P.: Information background of 11th-15th centuries earthquakes located by the current catalogues in Vrancea (Romania), *Nat. Hazards*, 53, 575-604, 2010.
- 600 Toma-Dănilă, D.: Transport network vulnerability assessment methodology, based on the cost-distance method and GIS Integration, in: *Intelligent systems for Crisis management. Geo-information for Disaster Management (Gi4DM)*, edited by Zlatanova, S., Peters, R., Dilo, A., and Scholten, H., pp. 199-213, Springer-Verlag, Berlin Heidelberg, 2013.
- 605 Török, I.: Assessment of Social Vulnerability to Natural Hazards in Romania, *Carpathian Journal of Earth and Environmental Sciences*, 12, 549-562, 2017.

- Tuns, I., Tămaş, F.-L., and Paşcan, V.: Structural analysis of an existing building on the fulfilment of level of assurance to seismic actions. *J. Appl. Eng. Sci.*, 16,109-116, 2013.
- Vatseva, R., Solakov, D., Tcherkezona, E., Simeonova, S., and Trifonova, P.: Applying GIS in seismic hazard assessment and data integration for disaster management, in: *Intelligent systems for Crisis management. Geo-information for Disaster Management (Gi4DM)*, edited by Zlatanova, S., Peters, R., Dilo, A., and Scholten, H., pp. 171-183, Springer-Verlag, Berlin Heidelberg, 2013.
- 610 Waugh, Jr. W. L., and Streib, G.: Collaboration and leadership for effective emergency management. *Public Adm. Rev.*, 66, 131-140, 2006.
- 615 Vojnovic, I., Kotval-K., Z., Lee, J., Ye, M., Ledoux, T., Varnakovida, P., and Messina, J.: Urban built environments, accessibility, and travel behavior in a declining *urban* core: The extreme conditions of disinvestment and suburbanization in the Detroit region, *J. Urban Aff.*, 36, 225-255, 2014.
- Weiping, H., and Chi, W.: Urban road network accessibility evaluation method based on GIS spatial analysis techniques, In: *Proc. Int. Arch. Photogr., Remote Sens. Spat. Inf. Sci. Conf.*, 38, 114-117, 2011.
- 620 Wegscheider, S., Schneiderhan, T., Mager, A., Zwenzner, H., Post, J., and Strunz, G.: Rapid mapping in support of emergency response after earthquake events. *Nat. Hazards*, 68, 181-195, 2013.
- Wiens, M., Schatter, F., Zobel C.W. and Schultmann, F. in Editors: Fekete A., Fiedrich F (eds), 2018, *Urban Disaster Resilience and Security*, pp.145-168. *The Urban Book Series*, Springer, 2018. <https://doi.org/10.1007/978-3-319-68606-6>
- 625 Yiannakoulis, N., Bland, W., Svenson, L. W.: Estimating the effect of turn penalties and traffic congestion on measuring spatial accessibility to primary health care, *Appl. Geogr.*, 39, 172-182, 2013.

**Comment [I.I.25]:** New added reference according with suggestion of RC1
